# Supplementary material for: Purification and Characterization of a White Laccase with Pronounced Dye Decolorizing Ability and HIV-1 Reverse Transcriptase Inhibitory Activity from Lepista nuda
Source: MDPI journal article supplement (doi:10.3390/molecules21040415), 2016-03-26
Supplement: s1 [file s1]

# Supplementary Materials: Purification and Characterization of a White Laccase with Pronounced Dye Decolorizing Ability and HIV-1 Reverse Transcriptase Inhibitory Activity from *Lepista nuda*

Mengjuan Zhu, Guoqing Zhang, Li Meng, Hexiang Wang, Kexiang Gao and Tb Ng

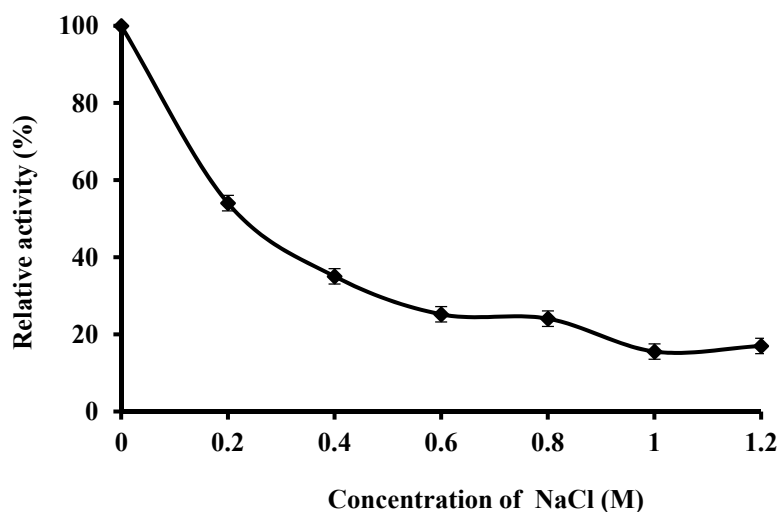

Figure S1. The tolerance of *Lepista nuda* laccase to NaCl.

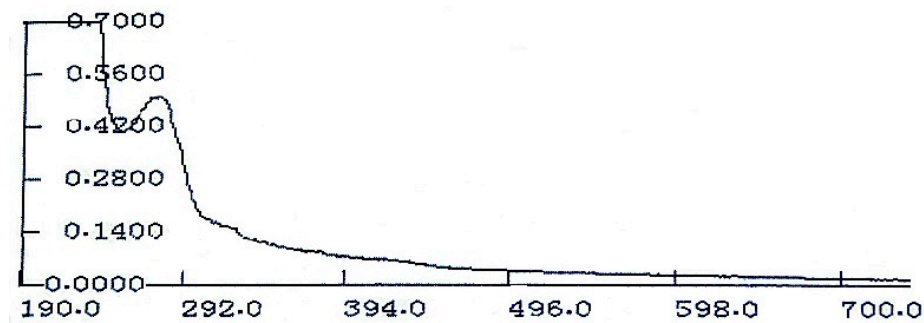

Figure S2. The spectrum scanning map of *Lepista nuda* laccase. The wavelength was from 190 nm to 700 nm.
